# Supplementary material for: Self-reported delays in care-seeking in West Africa during the first wave of the COVID-19 pandemic
Source: Springer Nature journal article supplement (doi:10.1186/s12913-023-09812-x), 2023-07-22

**Appendix A.** Consort diagrams for data collection, by country.

*Figure 1.* Consort diagram for Burkina Faso.

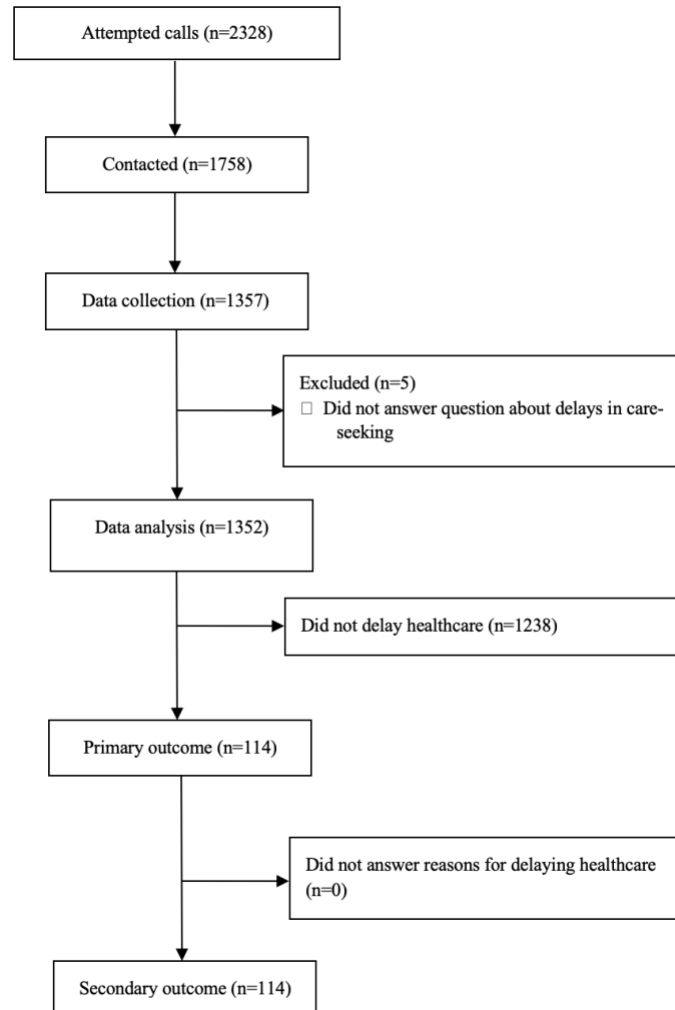

Figure 2. Consort diagram for Ghana

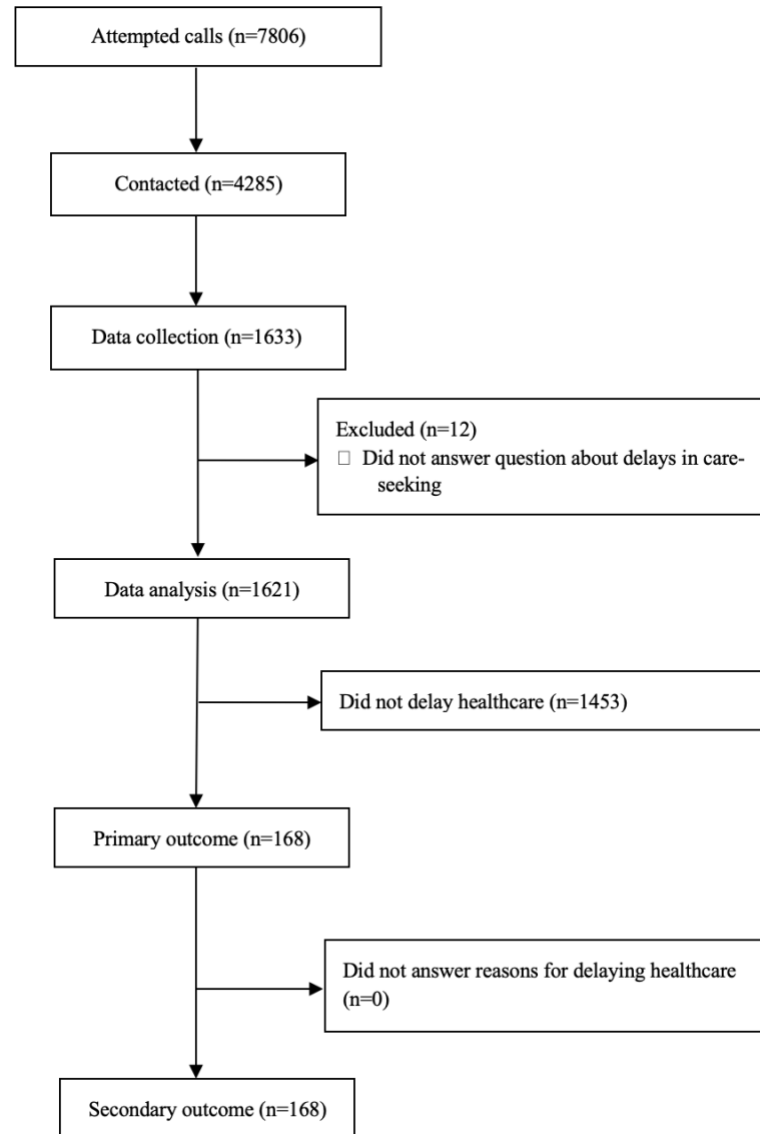

Figure 3. Consort diagram for Sierra Leone.

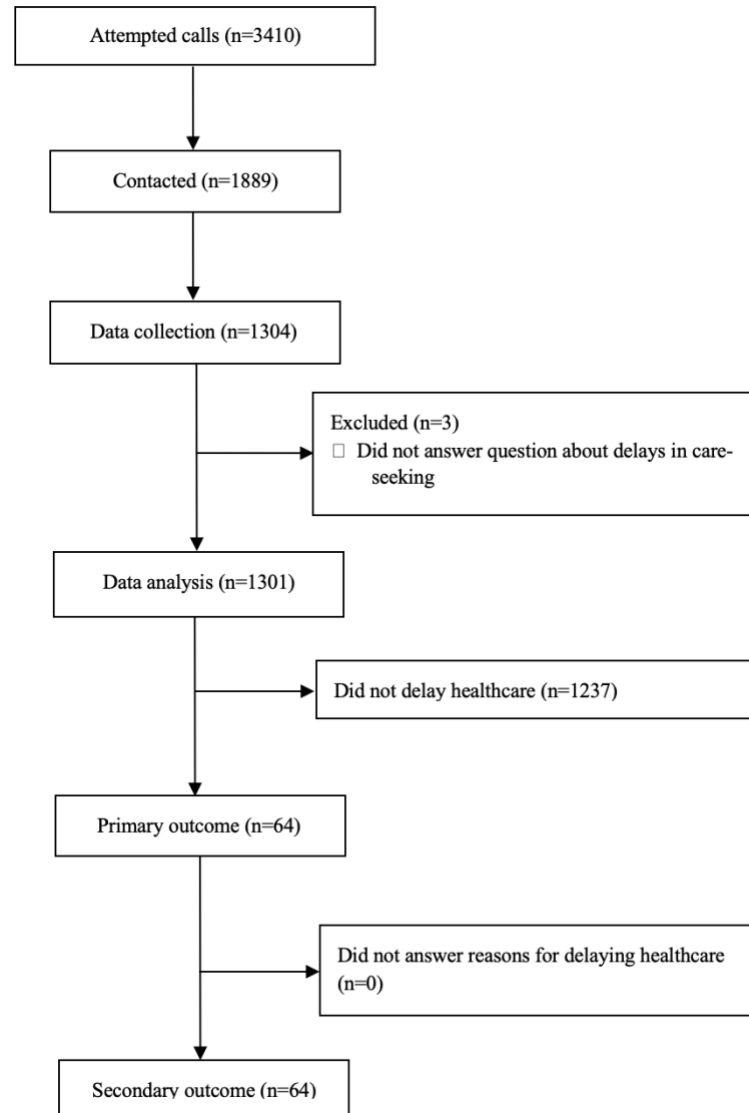

Supplement: MOESM1 [file 25834632]
