# Supplementary material for: Self-reported delays in care-seeking in West Africa during the first wave of the COVID-19 pandemic
Source: Springer Nature journal article supplement (doi:10.1186/s12913-023-09812-x), 2023-07-22
Supplement: MOESM2 [file 25834632]

**Appendix B.** Unadjusted bivariate and multivariate analyses by country

**Table 4.** Unadjusted bivariate analyses, by country, of sociodemographic information, COVID-19 perceptions, food insecurity, and self-reported delays in care-seeking using chi-square tests

|                                                                                            | <i>Burkina Faso</i> |      |       |                | <i>Ghana</i> |      |                    |                | <i>Sierra Leone</i> |      |       |                |
|--------------------------------------------------------------------------------------------|---------------------|------|-------|----------------|--------------|------|--------------------|----------------|---------------------|------|-------|----------------|
|                                                                                            | #                   | %    | Delay | <i>p</i> value | #            | %    | Delay <sup>1</sup> | <i>p</i> value | #                   | %    | Delay | <i>p</i> value |
| <b>Total</b>                                                                               | 114                 |      | 8.43  |                |              |      | 10.4               |                | 64                  |      | 4.9   |                |
| <b>Age</b>                                                                                 |                     |      |       | <b>0.01**</b>  |              |      |                    | 0.13           |                     |      |       | 0.54           |
| 18-30                                                                                      | 749                 | 55.4 | 6.8   |                | 914          | 56.4 | 9.2                |                | 648                 | 49.7 | 4.3   |                |
| 31-40                                                                                      | 344                 | 25.4 | 12.2  |                | 422          | 26.0 | 12.8               |                | 429                 | 32.9 | 5.8   |                |
| 41+                                                                                        | 264                 | 19.2 | 8.1   |                | 285          | 17.6 | 10.5               |                | 227                 | 17.4 | 4.9   |                |
| <b>Gender</b>                                                                              |                     |      |       | <b>0.008**</b> |              |      |                    | 0.27           |                     |      |       | 0.69           |
| Male                                                                                       | 932                 | 68.9 | 7.1   |                | 1000         | 61.7 | 9.7                |                | 844                 | 64.9 | 5.1   |                |
| Female                                                                                     | 420                 | 31.1 | 11.4  |                | 621          | 38.3 | 11.4               |                | 457                 | 35.1 | 4.6   |                |
| <b>Location</b>                                                                            |                     |      |       | 0.84           |              |      |                    | 0.32           |                     |      |       | 0.62           |
| Urban                                                                                      | 901                 | 66.4 | 8.3   |                | 1103         | 32.0 | 9.3                |                | 1176                | 90.4 | 5.0   |                |
| Non-Urban                                                                                  | 456                 | 33.6 | 8.7   |                | 518          | 68.0 | 10.9               |                | 125                 | 9.6  | 4.0   |                |
| <b>Highest level of education completed</b>                                                |                     |      |       | 0.94           |              |      |                    | 0.49           |                     |      |       | 0.07           |
| Less than secondary                                                                        | 487                 | 36.0 | 8.2   |                | 542          | 33.5 | 10.2               |                | 479                 | 36.9 | 4.8   |                |
| Secondary or vocational                                                                    | 338                 | 25.0 | 8.9   |                | 584          | 36.1 | 9.4                |                | 484                 | 37.2 | 3.9   |                |
| Post-secondary                                                                             | 527                 | 39.0 | 8.4   |                | 491          | 30.4 | 11.6               |                | 297                 | 22.9 | 7.4   |                |
| Other                                                                                      |                     |      |       |                |              |      |                    |                | 40                  | 3.1  | 0.0   |                |
| <b>Days in the past week staying at home all day, without going out at all and without</b> |                     |      |       | 0.51           |              |      |                    | 0.20           |                     |      |       | 0.91           |

|                                                                                      |     |      |      |      |      |      |      |                |      |      |      |                |
|--------------------------------------------------------------------------------------|-----|------|------|------|------|------|------|----------------|------|------|------|----------------|
| <b>receiving any visits</b>                                                          |     |      |      |      |      |      |      |                |      |      |      |                |
| Never (0)                                                                            | 515 | 38.1 | 7.0  |      | 366  | 22.7 | 9.6  |                | 401  | 30.8 | 5.5  |                |
| Once (1)                                                                             | 139 | 10.3 | 9.4  |      | 137  | 8.5  | 7.3  |                | 177  | 13.6 | 5.1  |                |
| Some days (2-3)                                                                      | 231 | 17.1 | 7.8  |      | 266  | 16.5 | 8.7  |                | 235  | 18.1 | 4.7  |                |
| Most days (4-6)                                                                      | 159 | 11.8 | 10.1 |      | 360  | 22.3 | 10.3 |                | 250  | 19.2 | 5.2  |                |
| Every day (7)                                                                        | 308 | 22.8 | 10.6 |      | 486  | 30.1 | 13.0 |                | 238  | 18.3 | 3.8  |                |
| <b>Feels that they or anyone in the household is at risk of contracting COVID-19</b> |     |      |      | 0.13 |      |      |      | <b>0.004**</b> |      |      |      | <b>0.000**</b> |
| No                                                                                   | 777 | 60.9 | 7.7  |      | 1158 | 73.5 | 8.9  |                | 1039 | 80.2 | 3.9  |                |
| Yes                                                                                  | 500 | 39.2 | 10.2 |      | 418  | 26.5 | 13.9 |                | 257  | 19.8 | 9.3  |                |
| <b>Perception of the government's reaction to COVID-19 outbreak</b>                  |     |      |      | 0.10 |      |      |      | 0.35           |      |      |      | <b>0.01**</b>  |
| Much too extreme                                                                     | 98  | 7.3  | 13.3 |      | 53   | 3.4  | 13.2 |                | 48   | 3.7  | 14.6 |                |
| Somewhat too extreme                                                                 | 109 | 8.1  | 11.9 |      | 40   | 2.6  | 5.0  |                | 164  | 12.7 | 7.9  |                |
| Appropriate                                                                          | 855 | 63.2 | 7.1  |      | 1078 | 68.7 | 10.1 |                | 944  | 73.1 | 4.1  |                |
| Somewhat insufficient                                                                | 145 | 10.7 | 7.6  |      | 145  | 9.2  | 14.5 |                | 109  | 8.4  | 3.7  |                |
| Not sufficient                                                                       | 145 | 10.7 | 11.0 |      | 254  | 16.2 | 9.8  |                | 27   | 2.1  | 3.7  |                |
| <b>Amount of pay earned in the past week<sup>2</sup></b>                             |     |      |      | 0.29 |      |      |      | 0.77           |      |      |      | 0.38           |
| More or the same income                                                              | 462 | 61.0 | 10.8 |      | 297  | 28.1 | 9.8  |                | 201  | 19.8 | 4.0  |                |

|                                                                                                 |      |      |      |                |      |      |      |                |     |      |     |              |
|-------------------------------------------------------------------------------------------------|------|------|------|----------------|------|------|------|----------------|-----|------|-----|--------------|
| Less or no income                                                                               | 295  | 39.0 | 8.5  |                | 761  | 71.9 | 10.4 |                | 813 | 80.2 | 5.5 |              |
| <b>Days in the past week where they had to limit portion size at meal-times</b>                 |      |      |      | <b>0.000**</b> |      |      |      | <b>0.001**</b> |     |      |     | <b>0.02*</b> |
| No                                                                                              | 1009 | 74.4 | 6.7  |                | 925  | 57.1 | 8.2  |                | 733 | 56.2 | 3.7 |              |
| Yes                                                                                             | 348  | 25.6 | 13.4 |                | 696  | 42.9 | 13.2 |                | 571 | 43.8 | 6.5 |              |
| <b>Days in the past week where they had to reduce the number of meals eaten in a day</b>        |      |      |      | <b>0.002**</b> |      |      |      | <b>0.01**</b>  |     |      |     | <b>0.02*</b> |
| No                                                                                              | 1006 | 74.1 | 7.1  |                | 860  | 53.1 | 8.6  |                | 747 | 57.3 | 3.8 |              |
| Yes                                                                                             | 351  | 25.9 | 12.4 |                | 761  | 47.0 | 12.4 |                | 557 | 42.7 | 6.5 |              |
| <b>Days in the past week where they were unable to buy food due to drop in household income</b> |      |      |      | <b>0.004**</b> |      |      |      | <b>0.001**</b> |     |      |     | 0.21         |
| No                                                                                              | 691  | 52.4 | 6.4  |                | 674  | 42.9 | 7.6  |                | 385 | 30.4 | 3.9 |              |
| Yes                                                                                             | 629  | 47.7 | 10.8 |                | 898  | 57.1 | 12.7 |                | 880 | 69.6 | 5.6 |              |
| <b>Food insecurity<sup>3</sup></b>                                                              |      |      |      | <b>0.000**</b> |      |      |      | <b>0.009**</b> |     |      |     | 0.10         |
| No                                                                                              | 624  | 46.0 | 5.5  |                | 502  | 30.7 | 7.4  |                | 315 | 24.2 | 3.2 |              |
| Yes                                                                                             | 733  | 54.0 | 11.0 |                | 1131 | 69.3 | 11.7 |                | 989 | 75.8 | 5.5 |              |

\* $p < 0.05$

\*\*  $p < 0.01$

<sup>2</sup>Compared to a week in mid-March

<sup>3</sup>Smaller portions, reducing number of meals, or unable to buy food

**Table 5.** Unadjusted multivariate logistic regression of associations of delays in care-seeking with sociodemographic information, COVID-19 beliefs, income, and food insecurity, by country

| Variable                                                      | Burkina Faso        |                | Ghana               |                | Sierra Leone        |                |
|---------------------------------------------------------------|---------------------|----------------|---------------------|----------------|---------------------|----------------|
|                                                               | Adjusted OR<br>[CI] | <i>p</i> value | Adjusted OR<br>[CI] | <i>p</i> value | Adjusted OR<br>[CI] | <i>p</i> value |
| <b>Age</b>                                                    |                     |                |                     |                | n/a <sup>1</sup>    |                |
| 18-30<br>(Reference)                                          | -                   | -              | -                   | -              | -                   | -              |
| 31-40                                                         | 2.06 [1.32-3.21]    | <b>0.001**</b> | 1.47 [0.99-2.17]    | <b>0.05*</b>   | -                   | -              |
| 41+                                                           | 1.29 [0.74-2.23]    | 0.37           | 1.32 [0.83-2.09]    | 0.24           | -                   | -              |
| <b>Gender</b>                                                 |                     |                | n/a                 |                | n/a                 |                |
| Male<br>(Reference)                                           | -                   | -              | -                   | -              | -                   | -              |
| Female                                                        | 1.76 [1.17-2.65]    | <b>0.01**</b>  | -                   | -              | -                   | -              |
| <b>Location</b>                                               | n/a                 |                |                     |                | n/a                 |                |
| Non-Urban<br>(Reference)                                      | -                   | -              | -                   | -              | -                   | -              |
| Urban                                                         | -                   | -              | 0.89 [0.62-1.28]    | 0.53           | -                   | -              |
| <b>Highest level<br/>of education<br/>completed</b>           | n/a                 |                |                     |                | n/a                 |                |
| Less than<br>secondary<br>(Reference)                         | -                   | -              | -                   | -              | -                   | -              |
| Secondary or<br>vocational                                    | -                   | -              | 1.08 [0.71-1.65]    | 0.73           | -                   | -              |
| Post-secondary                                                | -                   | -              | 1.15 [0.74-1.78]    | 0.53           | -                   | -              |
| <b>Feels that<br/>someone<br/>household is<br/>at risk of</b> |                     |                |                     |                |                     |                |

|                                                                 |                  |               |                   |              |                   |               |
|-----------------------------------------------------------------|------------------|---------------|-------------------|--------------|-------------------|---------------|
| <b>contracting COVID-19</b>                                     |                  |               |                   |              |                   |               |
| No (Reference)                                                  | -                | -             | -                 | -            | -                 | -             |
| Yes                                                             | 1.76 [1.17-2.65] | <b>0.01**</b> | 1.56 [1.09-2.23]] | <b>0.02*</b> | 2.21 [1.22-4.01]  | <b>0.01**</b> |
| <b>Perception of government's reaction to COVID-19 outbreak</b> | n/a              |               |                   |              |                   |               |
| Much too extreme (Reference)                                    | -                | -             | -                 | -            | -                 | -             |
| Somewhat too extreme                                            | -                | -             | 0.31 [0.06-1.60]  | 0.16         | 0.50 [0.17-1.46]  | 0.21          |
| Appropriate                                                     | -                | -             | 0.61 [0.27-1.41]  | 0.25         | 0.28 [0.11-0.72]  | <b>0.01**</b> |
| Somewhat insufficient                                           | -                | -             | 0.90 [0.35-2.31]  | 0.83         | 0.18 [0.04-0.79]] | <b>0.02*</b>  |
| Not sufficient                                                  | -                | -             | 0.61 [0.24-1.52]  | 0.29         | 0.27 [0.03-2.46]  | 0.25          |
| <b>Amount of pay earned in the past week<sup>2</sup></b>        | n/a              |               | n/a               |              |                   |               |
| More or the same income (Reference)                             | -                | -             | -                 | -            | -                 | -             |
| Less or no income                                               | -                | -             | -                 | -            | 0.81 [0.36-1.78]  | 0.60          |
| <b>Food insecurity<sup>3</sup></b>                              |                  |               |                   |              |                   |               |
| No (Reference)                                                  | -                | -             | -                 | -            | -                 | -             |

|     |                  |                |                  |               |                  |      |
|-----|------------------|----------------|------------------|---------------|------------------|------|
| Yes | 2.04 [1.34-3.13] | <b>0.001**</b> | 1.56 [1.10-2.21] | <b>0.01**</b> | 1.61 [0.73-3.52] | 0.24 |
|-----|------------------|----------------|------------------|---------------|------------------|------|

<sup>1</sup>Not analyzed due to lack of significance in bivariate analyses

<sup>2</sup>Compared to a week in mid-March

<sup>3</sup>Smaller portions, reducing number of meals, or unable to buy food

\* $p \leq 0.05$

\*\*  $p \leq 0.01$

**Table 6.** Unadjusted bivariate country analyses of self-reported reasons for delays in care-seeking and access, sociodemographic information, and food insecurity among individuals who reported delays in care-seeking

|                                             | Burkina Faso (n=114) |      |                |         |                | Ghana (n=168) |      |                |         |                | Sierra Leone (n=64) |      |                |         |                |
|---------------------------------------------|----------------------|------|----------------|---------|----------------|---------------|------|----------------|---------|----------------|---------------------|------|----------------|---------|----------------|
|                                             | #                    | Cost | <i>P</i> value | Concern | <i>P</i> value | #             | Cost | <i>P</i> value | Concern | <i>p</i> value | #                   | Cost | <i>P</i> value | Concern | <i>P</i> value |
| <b>Total</b>                                |                      | 11.5 |                | 85.3    |                | 49            | 29.2 |                | 63.1    |                |                     | 40.6 |                | 50.0    |                |
| <b>Gender</b>                               |                      |      | 0.41           |         | 0.37           |               |      | <b>0.03*</b>   |         | 0.11           |                     |      | 0.41           |         | 0.06           |
| Male                                        | 66                   | 6.1  |                | 78.8    |                | 97            | 35.4 |                | 56.0    |                | 43                  | 44.2 |                | 41.9    |                |
| Female                                      | 48                   | 14.6 |                | 85.4    |                | 71            | 21.9 |                | 69.7    |                | 21                  | 33.3 |                | 66.7    |                |
| <b>Location</b>                             |                      |      | 0.68           |         | 0.15           |               |      | 0.97           |         | 0.89           |                     |      | 0.98           |         | 0.64           |
| Urban                                       | 75                   | 8.0  |                | 85.3    |                | 120           | 27.6 |                | 64.8    |                | 59                  | 40.7 |                | 49.2    |                |
| Non-Urban                                   | 39                   | 12.8 |                | 74.4    |                | 48            | 27.8 |                | 63.5    |                | 5                   | 40.0 |                | 60.0    |                |
| <b>Highest level of education completed</b> |                      |      | 0.10           |         | 0.40           |               |      | 0.15           |         | 0.39           |                     |      | 0.98           |         | 0.56           |
| Less than secondary                         | 40                   | 15.0 |                | 84.1    |                | 55            | 35.6 |                | 56.8    |                | 23                  | 39.1 |                | 43.5    |                |
| Secondary or vocational                     | 30                   | 13.3 |                | 73.3    |                | 55            | 30.8 |                | 64.3    |                | 13                  | 42.1 |                | 47.4    |                |
| Post-secondary                              | 44                   | 2.3  |                | 85.0    |                | 57            | 18.5 |                | 70.7    |                | 28                  | 40.9 |                | 59.1    |                |
| <b>Food insecurity<sup>1</sup></b>          |                      |      | 0.11           |         | 0.89           |               |      | <b>0.02*</b>   |         | 0.35           |                     |      | <b>0.03*</b>   |         | 0.17           |
| No                                          | 34                   | 2.9  |                | 82.4    |                | 53            | 16.7 |                | 68.8    |                | 10                  | 10.0 |                | 70.0    |                |
| Yes                                         | 80                   | 12.5 |                | 81.3    |                | 115           | 35.3 |                | 60.3    |                | 54                  | 46.3 |                | 46.3    |                |

\* $p < 0.05$

\*\*  $p < 0.01$

<sup>1</sup>Smaller portions, reducing number of meals, or unable to buy food
